# Supplementary material for: Pediococcus pentosaceusB49 from human colostrum ameliorates constipation in mice
Source: Royal Society of Chemistry journal article supplement (doi:10.1039/d0fo00208a), 2020-01-01
Supplement: d0fo00208a1.pdf [file d0fo00208a1.pdf]

## Supplementary Information

### ***Pediococcus pentosaceus* B49 from human colostrum ameliorates constipation in mice**

Juqing Huang <sup>a,b</sup>, Suyi Li <sup>c</sup>, Qi Wang <sup>a,b</sup>, Xuefang Guan <sup>a,b</sup>, Lei Qian <sup>a</sup>, Jie Li <sup>a</sup>, Yi  
Zheng <sup>a</sup>, Bin Lin <sup>\*,a</sup>

<sup>a</sup> *Institute of Agricultural Engineering, Fujian Academy of Agricultural Sciences,  
Fuzhou, 350003, P.R.China*

<sup>b</sup> *Fujian Key Laboratory of Agricultural Product (Food) Processing, Fuzhou, 350003,  
P.R.China*

<sup>c</sup> *Institute of Biotechnology, Fujian Academy of Agricultural Sciences, Fuzhou,  
350003, P.R.China*

\* Corresponding author: Bin Lin

E-mail address: [linbin591@163.com](mailto:linbin591@163.com)

Tel: 86 (0591) 87864153

Fax: 86 (0591) 87864153

**Table S1. List of primer sequences used for RT-qPCR**

| Gene name      | Primer Sequence        |                        |
|----------------|------------------------|------------------------|
|                | Forward (5'-3')        | Reverse (5'-3')        |
| <i>Ache</i>    | GATTTTCCTTCGTGCCTGTG   | GACCCCGTAAACCAGAAAGTAG |
| <i>Cyp2d12</i> | GATACTCCTGCACATCCCAAG  | CTTGGCCTTCTCTATCTCTGC  |
| <i>Muc2</i>    | CATCCCTCAAAACCAGACCAG  | CCACAGGACCCAAAACAGTAG  |
| <i>Gsdmc2</i>  | AACATTCCCTTCACACTCCAG  | CTCCATCTTCAGACCACACTC  |
| <i>Pitx2</i>   | AAGTCGCAGAGAAAGATAAGGG | ATGTCTGGGTAGCGGTTTC    |
| <i>Gapdh</i>   | CCACTCACGGCAAATTCAAC   | CTCCACGACATACTCAGCAC   |

*Ache*: acetylcholinesterase; *Cyp2d12*: cytochrome P450, family 2, subfamily d, polypeptide 12; *Muc2*: mucin 2; *Gsdmc2*: gasdermin C2; *Pitx2*: paired-like homeodomain transcription factor 2; *Gapdh*: glyceraldehyde-3-phosphate dehydrogenase.

**The 16S rRNA gene sequence of *P. pentosaceus* B49 is shown as following:**

tgcagtcgaa cgaacttccg ttaattgatt atgacgtact tgtactgatt gagattttaa 60

cacgaagtga gtggcgaacg ggtgagtaac acgtgggtaa cctgcccaga agtaggggat 120

aacacctgga aacagatgct aataccgtat aacagagaaa accgcatggt tttctttaa 180

aagatggctc tgctatcact tctggatgga cccgcggcgt attagctagt tggtaggta 240

aaggctcacc aaggcagtga tacgtagccg acctgagagg gtaatcgcc acattgggac 300

tgacacacgg ccagactcc tacgggaggc agcagtaggg aatcttcac aatggacgca 360

agtctgatgg agcaacccg cgtgagtga gaagggttc ggctcgtaa gctctgtgt 420

taaagaagaa cgtgggtaag agtaactgt taccagtga cggtattaa ccagaaagcc 480

acggctaact acgtgccage agccgcggta atacgtaggt ggcaagcgtt atccggatt 540

attgggcgta aagcgagcgc aggcggtctt ttaagtctaa tgtgaaagcc ttcggctcaa 600

ccgaagaagt gcattgaaa ctgggagact tgagtgcaga agaggacagt ggaactccat 660

gtgtagcggg gaaatgcgta gatatatgga agaacaccag tggcgaaggc ggctgtctgg 720

tctgcaactg acgtgaggc tcgaaagcat gggtagcga caggattaga tacctggt 780

gtccatgccg taaacgatga ttactaagtg ttggagggt tccgccctc agtgctgcag 840

ctaacgcatt aagtaatccg cctggggagt acgaccgaa ggtgaaact caaagaatt 900

gacgggggccc cgcacaagcg gtggagcatg tggtttaatt cgaagctac ggaagaacct 960

taccaggtct tgacatctc tgacagtcta agagattaga ggttccctc ggggacagaa 1020

tgacaggtgg tgcattggtg tcgtcagctc gtgtcgtgag atgttgggtt aagtcccga 1080

acgagcgcaa cccttattac tagttgccag cattaagttg ggcactctag tgagactgcc 1140

ggtgacaaac cggaggaagg tggggacgac gtcaaatcat catgccctt atgacctggg 1200

|                                                                   |      |
|-------------------------------------------------------------------|------|
| ctacacacgt gctacaatgg atgtacaac gagtcgag accgcgaggt taagtaate     | 1260 |
| tcttaaaacc attctcagtt cggactgtag gctgcaactc gcctacacga agtcggaate | 1320 |
| gctagtaate gcggatcagc atgcccgggt gaatacgttc ccgggccttg tacacaccgc | 1380 |
| ccgtcacacc atgagagttt gtaacacca aagccgggtgg ggtaacctt aggagctagc  | 1440 |
| cgtctaa                                                           | 1447 |
